# Supplementary material
Source: HighWire-hosted journal article supplement (http://www.qdcxjkg.com/highwire/filestream/113519/field_highwire_adjunct_files/0/ERJ_01826-2012_Disclosures.pdf)
Supplement: ERJ_01826-2012_Disclosures.pdf [file ERJ_01826-2012_Disclosures.pdf]

**M. Maravisi.** Travel to the ERS Congress was funded by: GlaxoSmithKline, Pfizer, Chiesi and Boehringer. He has received fees for speaking from Novartis and Menarini, and fees for organising educational events from Chiesi, Novartis, Menarini, Sigma-Tau and Mediolanum.

**F.J.F. Herth** has received fees for lecturing and consulting from Pulmonx, PneuRx, Uptake Medical and Aeris.

**E. Clini** has received speaker's fees for contributions at the ERS Annual meetings 2011 and 2012.

**V. Cottin** has received fees for speaking from Intermune, Boehringer Ingelheim and Actelion, has participated as investigator to clinical trials sponsored by Intermune, Boehringer and Actelion, and as member of steering committee to a clinical trial sponsored by Boehringer Ingelheim.
